# Supplementary material
Source: publisher figshare collection journal article supplement (https://acs.figshare.com/ndownloader/files/4053613)

## Electronic Supporting Information for

Dissecting the complex recognition interfaces of highly potent tetrazole- and pyrrole-based anion binders

Thomas Pinter, Chakravarthi Simhadri and Fraser Hof\*

*Department of Chemistry, University of Victoria, Victoria, Canada V8W 3V6*

*fhof@uvic.ca*

### Table of contents

|                                             |            |
|---------------------------------------------|------------|
| Section 1. Supplementary NMR Titration Data | Pages 2-3  |
| Section 2. NMR Spectra for New Compounds    | Pages 4–11 |

## Section 1: Supplementary NMR titration data

Job plots were recorded in CD<sub>3</sub>CN at 500 MHz with a representative amide host (**14**) and the ester-derived host **11**. Chloride, an alternate halide (Br<sup>-</sup>), and a representative oxyanion (HSO<sub>4</sub><sup>-</sup>) were employed as guests. Data for host **14** is shown in a) guest = chloride, b) guest = bromide and c) guest = hydrogensulfate. Data for host **11** is shown in d) guest = chloride, e) guest = bromide and f) guest = hydrogensulfate.

a)

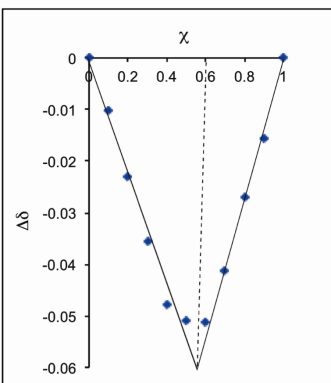

b)

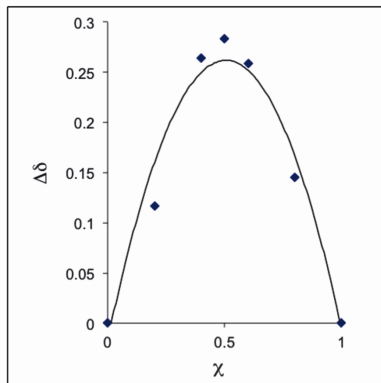

c)

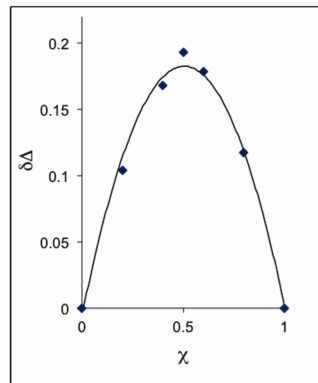

d)

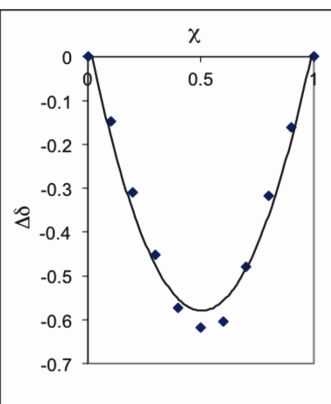

e)

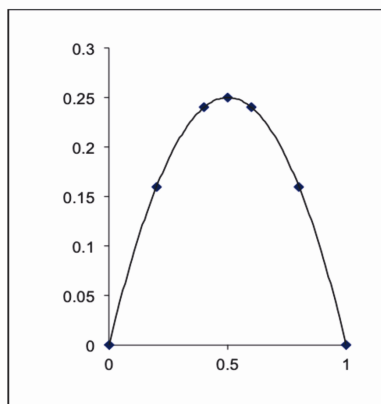

f)

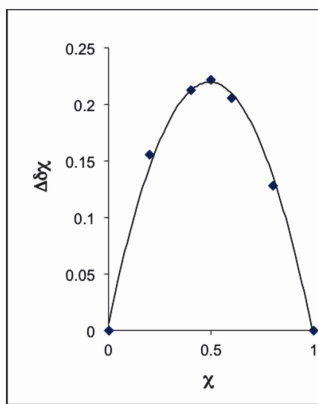

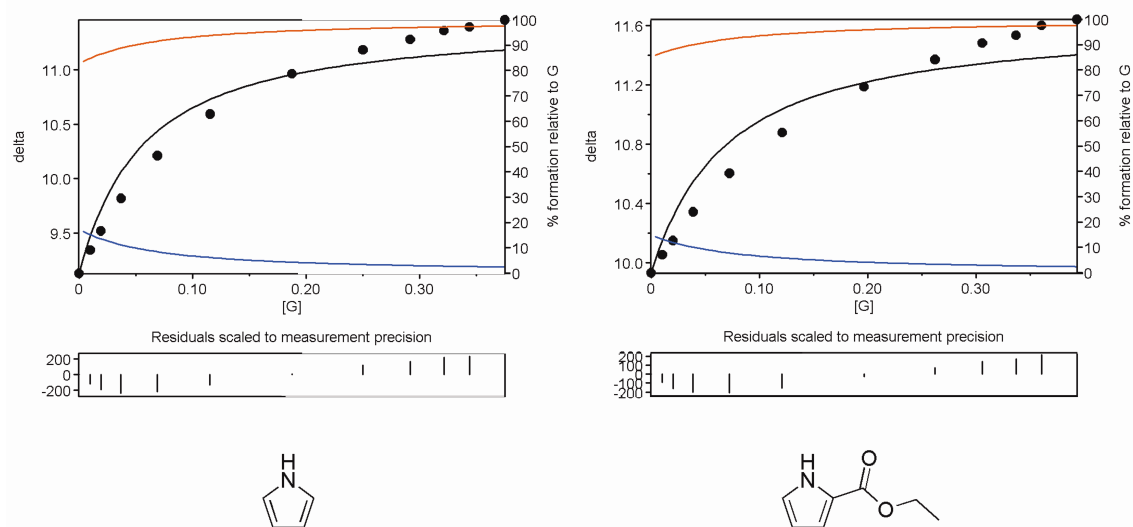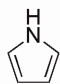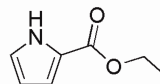

Binding curves for pyrrole and ethyl-2-pyrrole carboxylate titrated with tetrabutylammonium chloride. Data was acquired through  $^1\text{H}$  NMR titrations in  $\text{CD}_3\text{CN}$ . Host solutions ( $\sim 10$  mM) were used to make guest solutions ( $\sim 500$  mM) to ensure host concentrations were kept constant. Black points = experimental chemical shift data for pyrrole NH. Black lines = 1:1 binding isotherm. **Truth in advertising:** The systematic deviations of fitted lines from experimental points show that the 1:1 binding isotherm is close, but not strictly correct for these systems. The use of 1:2 and/or 2:1 binding isotherms (and attempts to collect this data at different concentrations of pyrrole) did not improve the quality of the fits. We assume deviations arising from changing ionic strength and/or an unanticipated self-association are behind the non-ideal behavior. The simplicity of these systems (monotopic NH donors mated with a simple, spherical H-bond acceptor) lead us to stick with the 1:1 fits as the best possible method for getting an estimate of  $K_{11}$  for these systems. The fitted  $K_{11}$  value for pyrrole- $\text{Cl}^-$  is  $200\text{ M}^{-1}$  and for the ester is  $150\text{ M}^{-1}$ . While the shapes of the curves show that these values *must* be overestimates of the true association constants, we conservatively use the relatively small deviation of fitted data from experimental data to estimate a binding constant of  $\geq 10\text{ M}^{-1}$  for each system. In any case, these values are not central to the conclusions of this paper.

## Section 2. $^1\text{H}$ and $^{13}\text{C}$ NMR spectra of all newly synthesized compounds

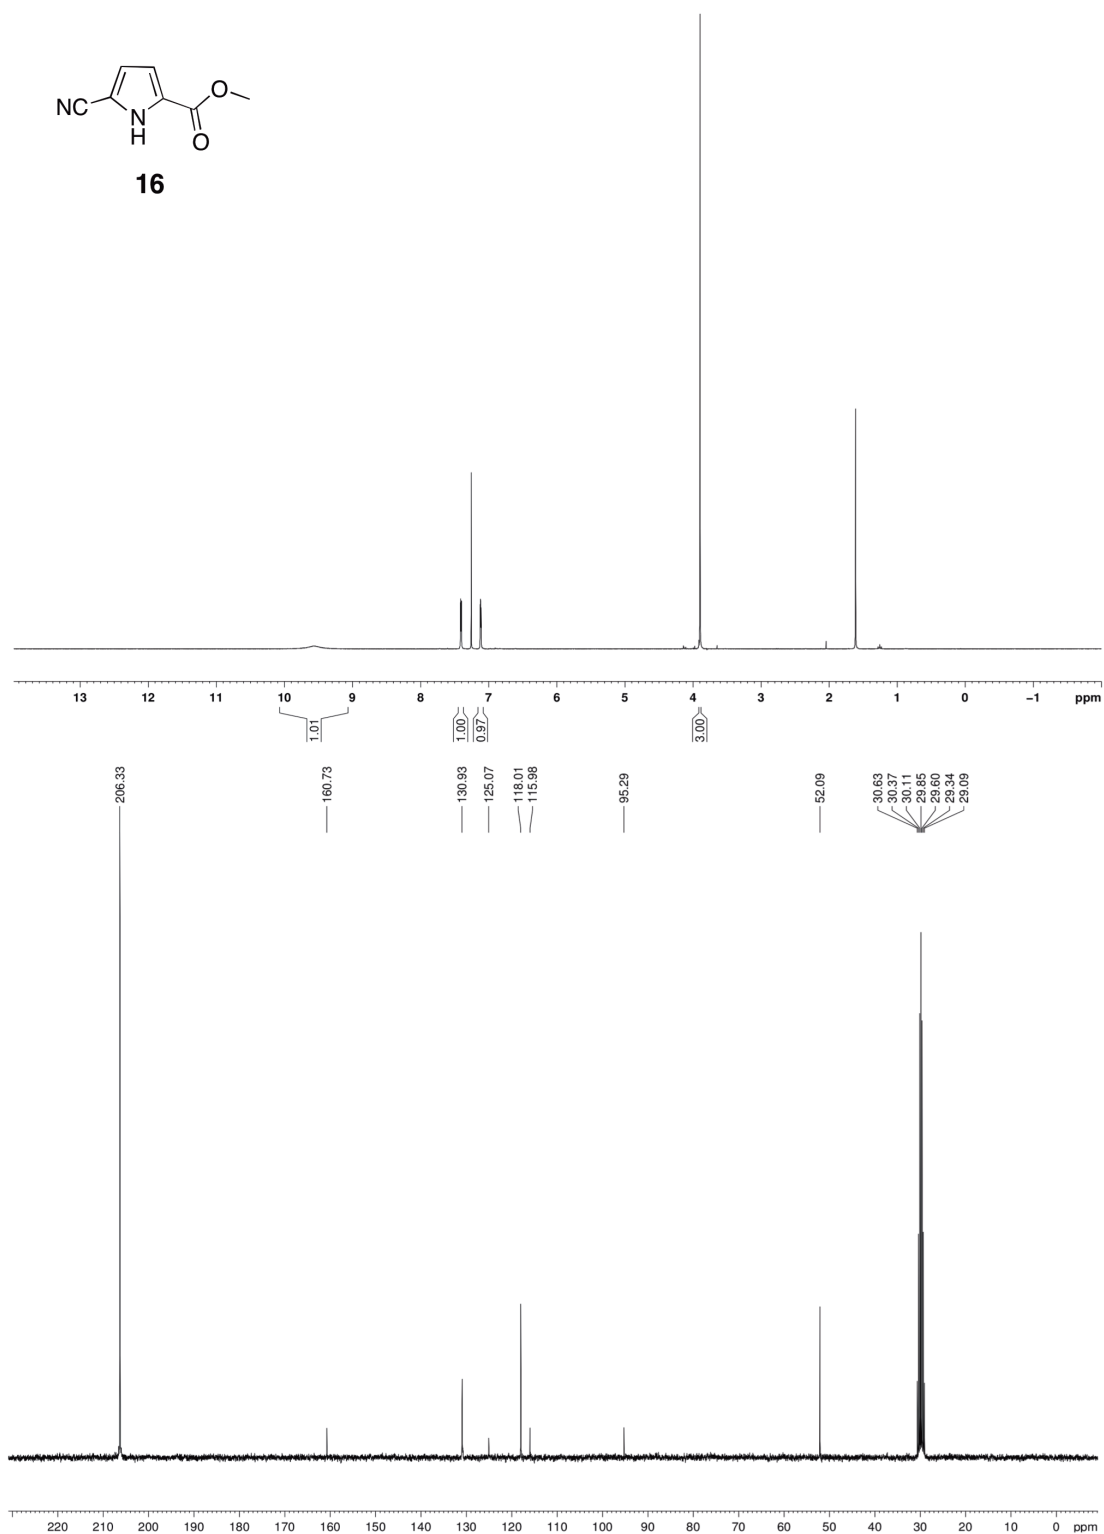

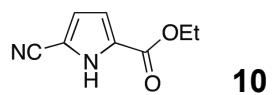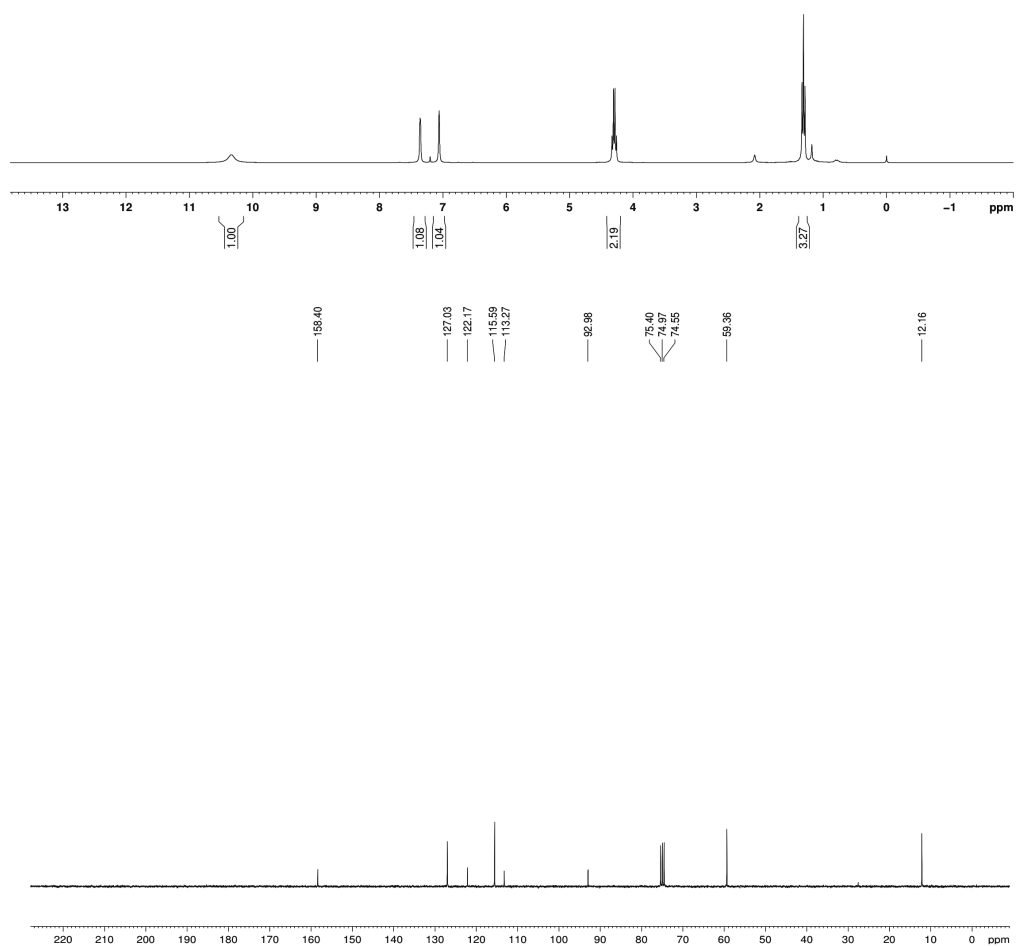

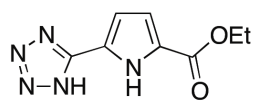

11

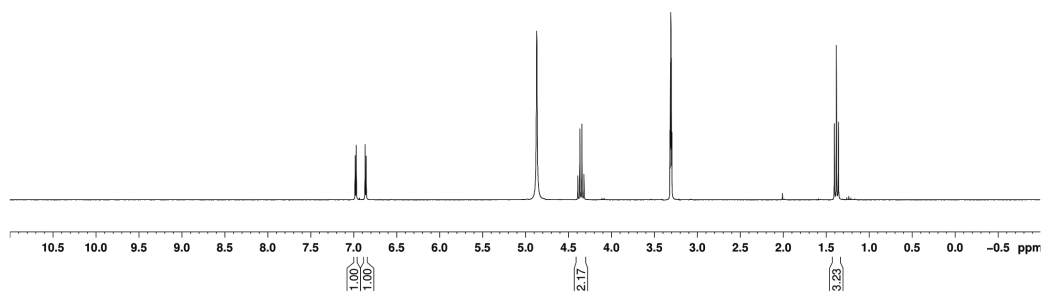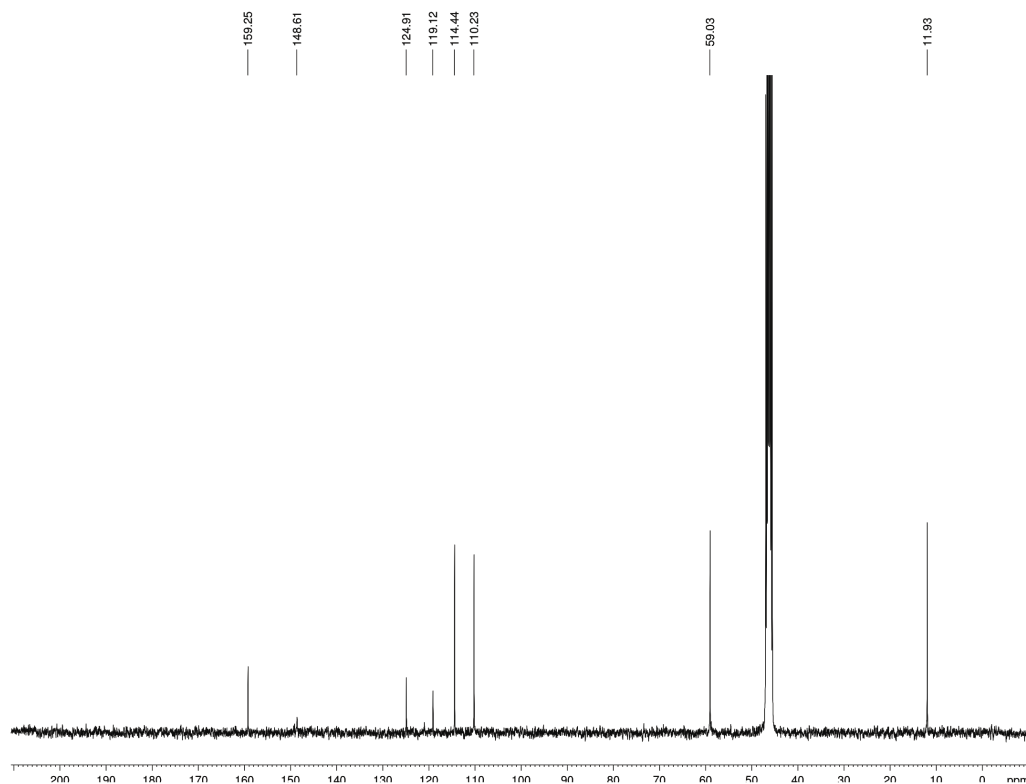

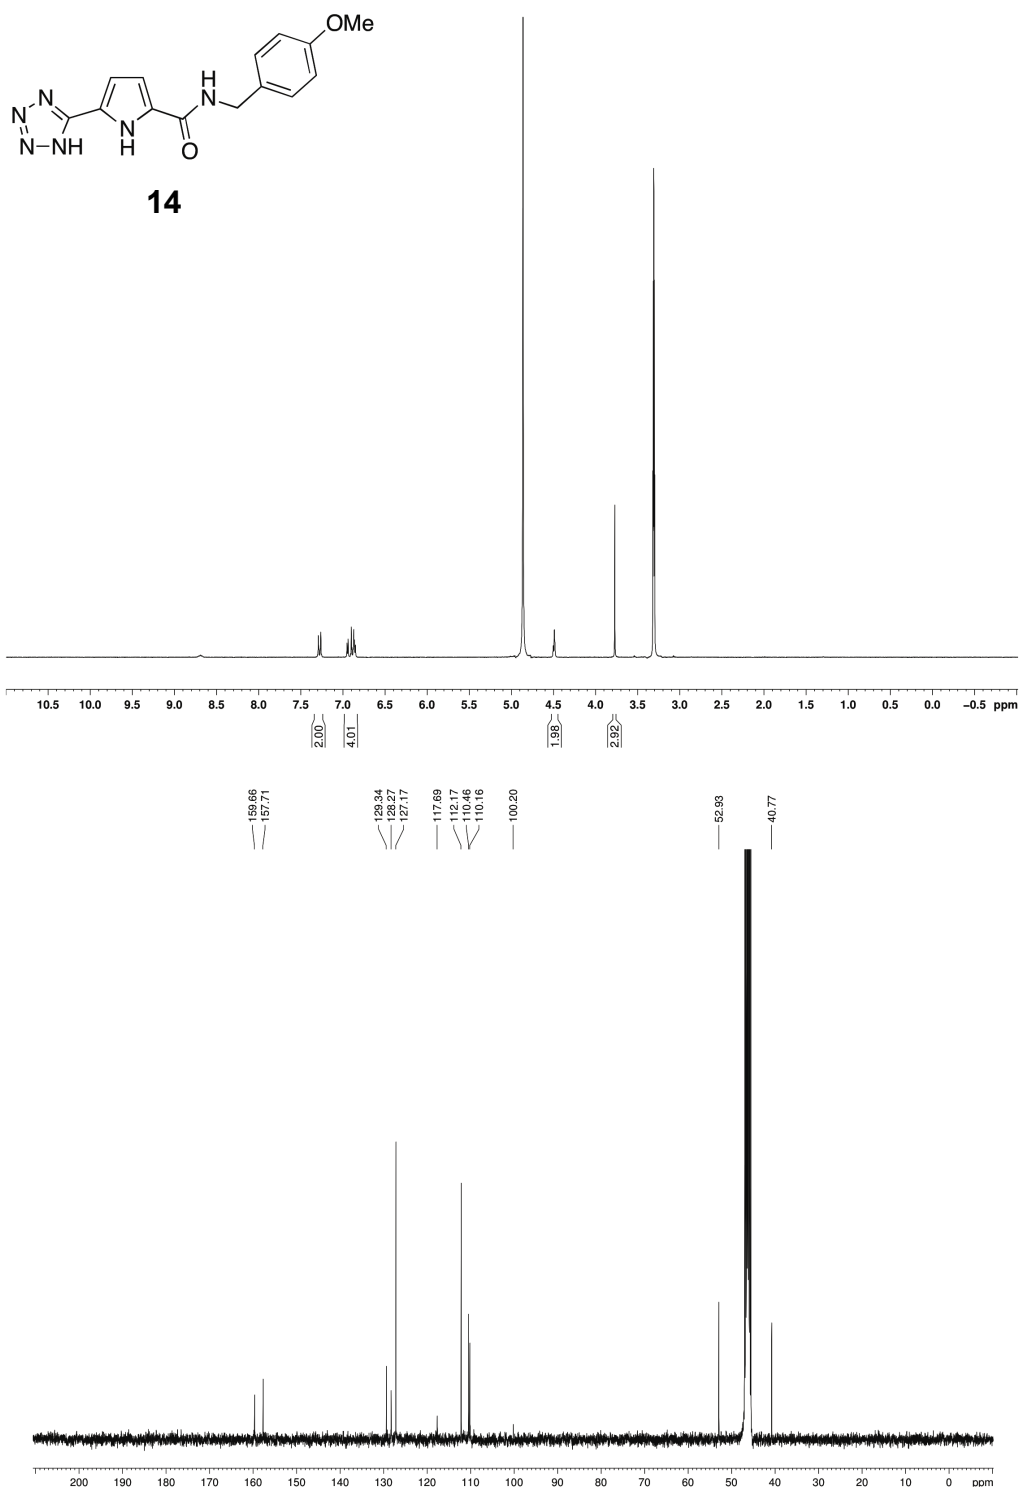

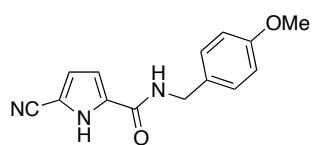

17

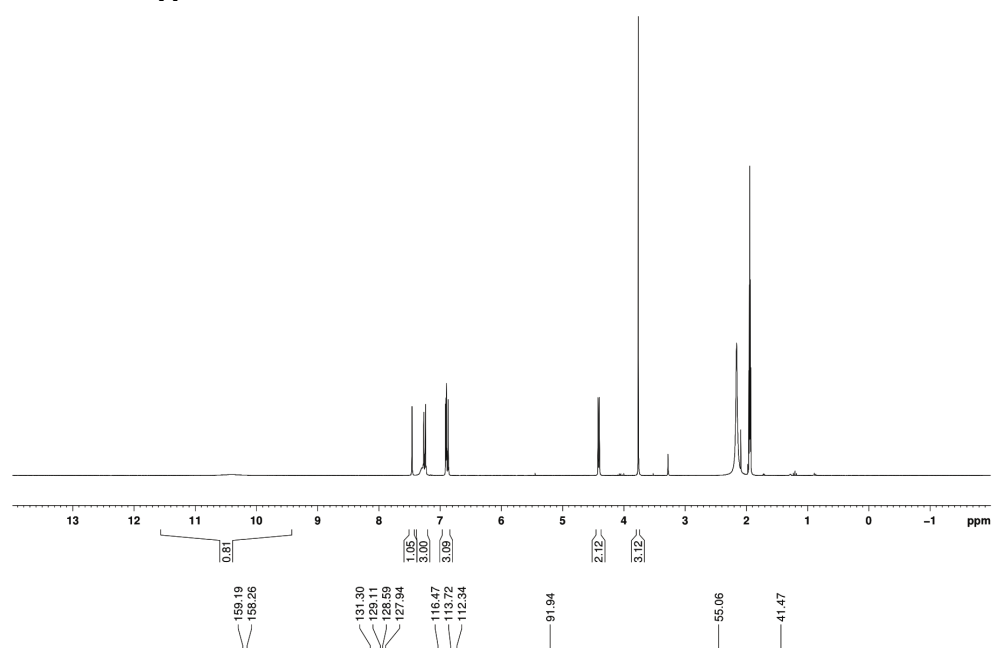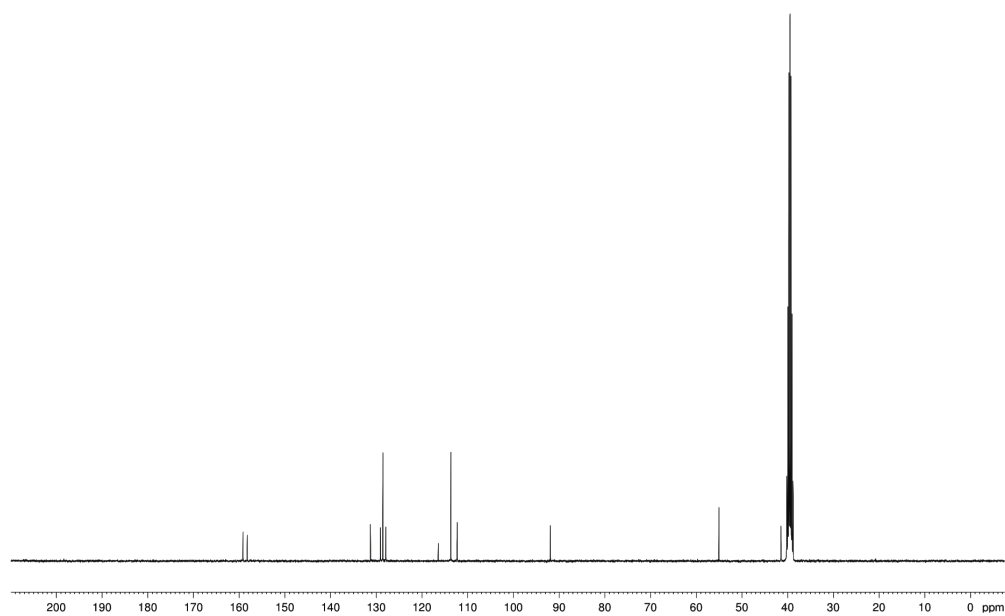



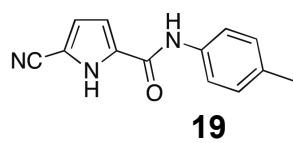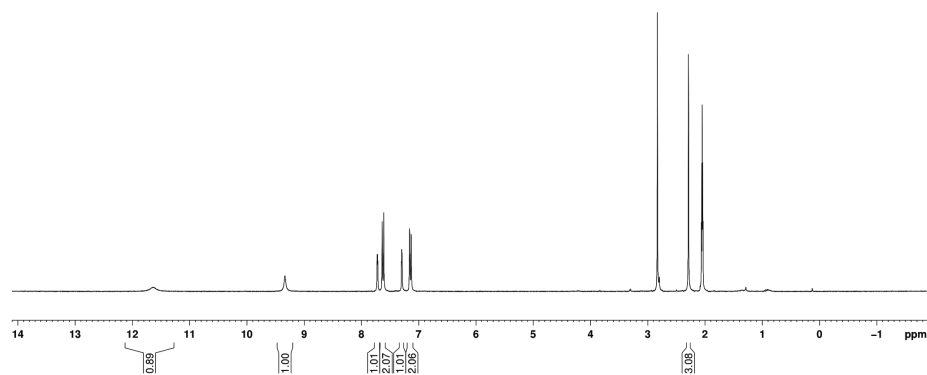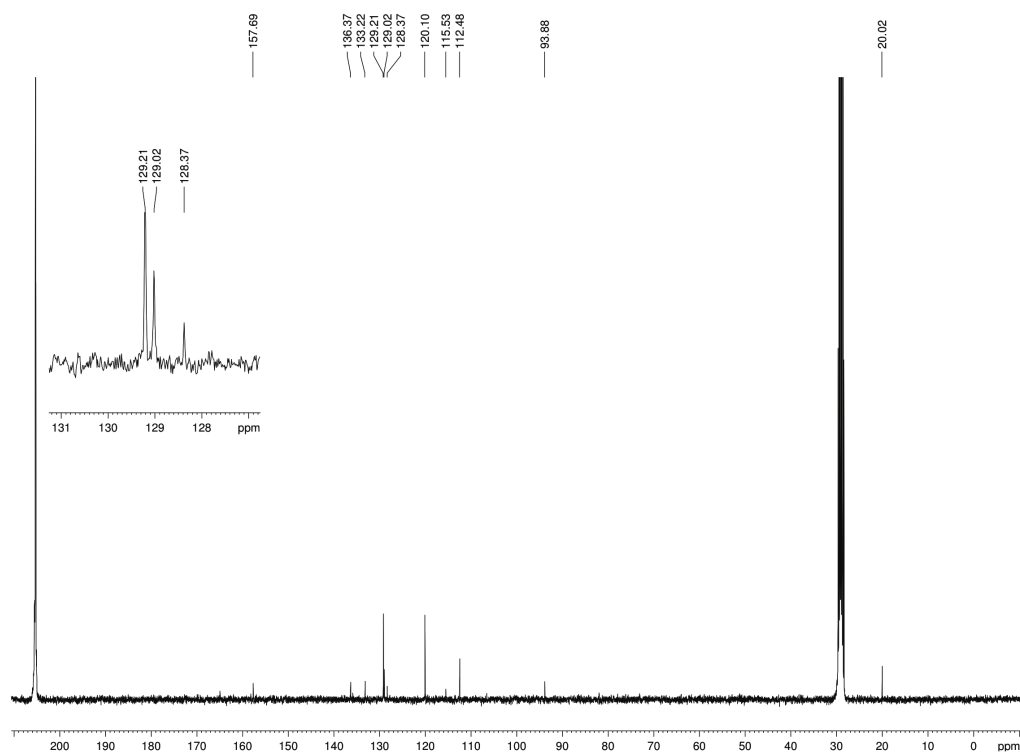

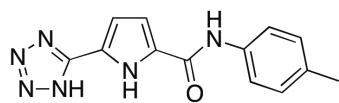

**13**

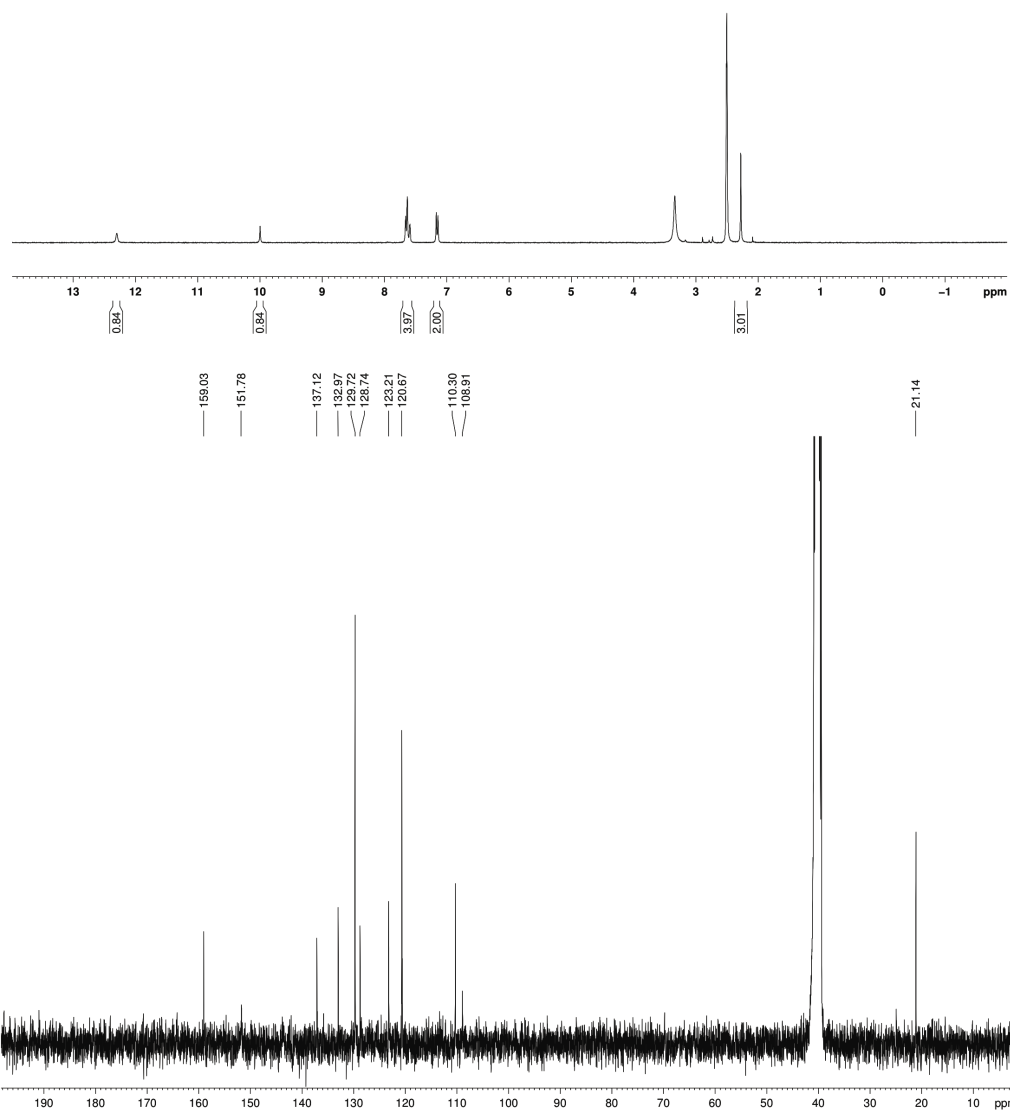

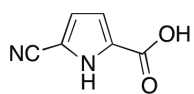

**18**

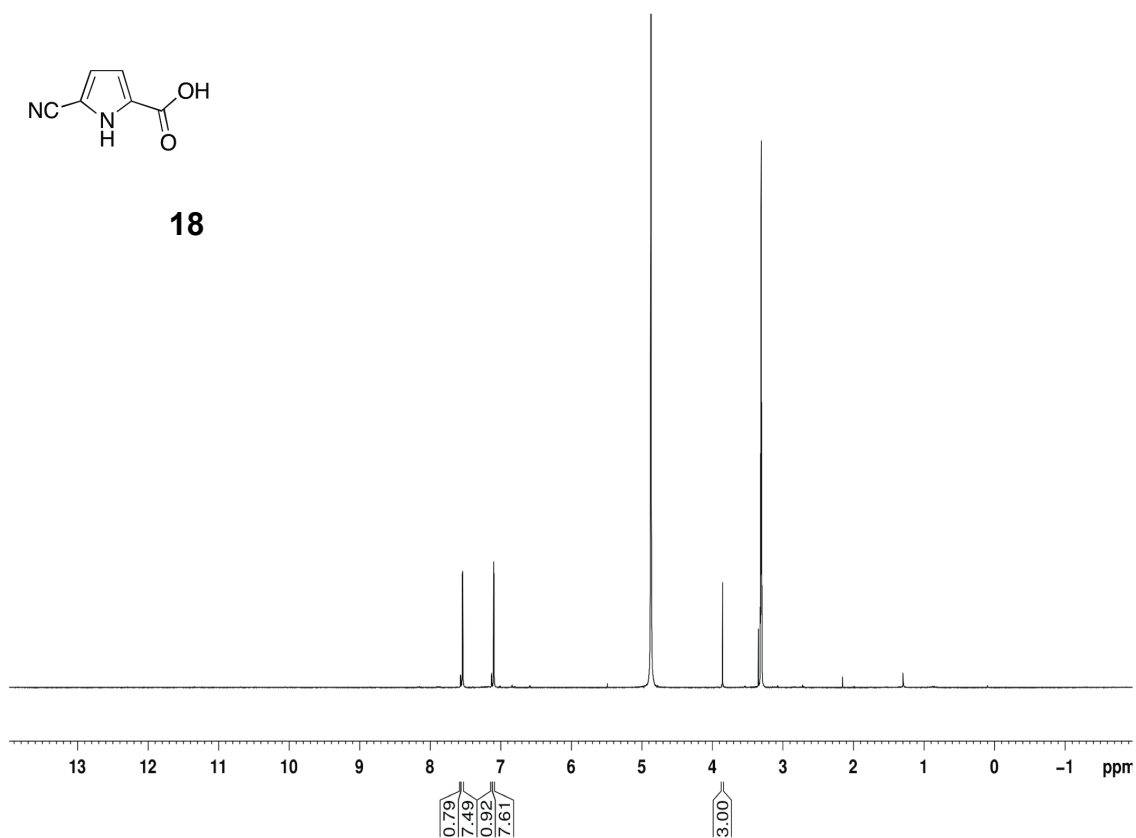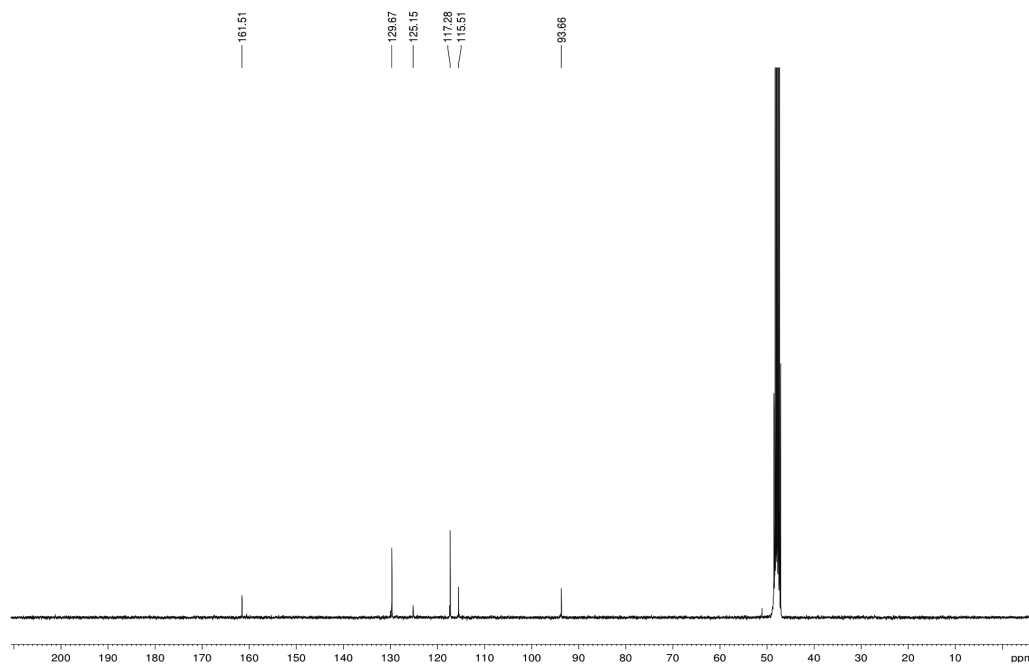

Supplement: Supplementary file 1 [file 4053613]
